# Supplementary material
Source: Royal Society of Chemistry journal article supplement (doi:10.1039/d6dt00501b)
Supplement: d6dt00501b1.pdf [file d6dt00501b1.pdf]

## Supplementary Information (SI)

### From cysteines to histidines - chemically distinct Cu(II)-binding motifs in the C-terminal region of archaeal CopT regulators

Wojciech Lizak,<sup>1</sup> Klaudia Kłopotowska,<sup>1</sup> Arian Kola,<sup>2</sup> Daniela Valensin,<sup>2,3</sup> Aleksandra Hecel<sup>1\*</sup>

<sup>1</sup> Faculty of Chemistry, University of Wrocław, 50383 Wrocław, Poland.

<sup>2</sup> Department of Biotechnology, Chemistry and Pharmacy, University of Siena, 53100 Siena, Italy.

<sup>3</sup> Consorzio Interuniversitario Risonanze Magnetiche di Metalloproteine (CIRMMP), Via L. Sacconi 6, Sesto Fiorentino 50019, Italy

\*[aleksandra.hecel2@uwr.edu.pl](mailto:aleksandra.hecel2@uwr.edu.pl)

Table S1 Stoichiometry, molecular formula and average m/z value for the species present in ESI-MS spectra of Cu(II) complexes with the (A) Ac-GPKGMPHGH-COOH and (B) Ac-GPKGMPGEEGHH-COOH, M:L molar ratio = 0.9:1 in water:methanol 50:50 solution.

| m/z                                    | ion                     | Molecular formula                                                                    |
|----------------------------------------|-------------------------|--------------------------------------------------------------------------------------|
| <b>(A) Cu(II)-Ac-GPKGMPHGH-COOH</b>    |                         |                                                                                      |
| 959.41                                 | [L] <sup>+</sup>        | C <sub>41</sub> H <sub>62</sub> N <sub>14</sub> O <sub>11</sub> S                    |
| 981.39                                 | [L+Na] <sup>+</sup>     | (C <sub>41</sub> H <sub>61</sub> N <sub>14</sub> O <sub>11</sub> S)Na                |
| 997.37                                 | [L+K] <sup>+</sup>      | (C <sub>41</sub> H <sub>61</sub> N <sub>14</sub> O <sub>11</sub> S)K                 |
| 480.21                                 | [L] <sup>2+</sup>       | C <sub>41</sub> H <sub>62</sub> N <sub>14</sub> O <sub>11</sub> S                    |
| 491.20                                 | [L+Na] <sup>2+</sup>    | (C <sub>41</sub> H <sub>61</sub> N <sub>14</sub> O <sub>11</sub> S)Na                |
| 499.18                                 | [L+K] <sup>2+</sup>     | (C <sub>41</sub> H <sub>61</sub> N <sub>14</sub> O <sub>11</sub> S)K                 |
| 502.19                                 | [L+2Na] <sup>2+</sup>   | (C <sub>41</sub> H <sub>60</sub> N <sub>14</sub> O <sub>11</sub> S)Na <sub>2</sub>   |
| 510.17                                 | [CuL] <sup>2+</sup>     | (C <sub>41</sub> H <sub>59</sub> N <sub>14</sub> O <sub>11</sub> S)Cu                |
| 320.47                                 | [L] <sup>3+</sup>       | C <sub>41</sub> H <sub>62</sub> N <sub>14</sub> O <sub>11</sub> S                    |
| <b>(B) Cu(II)-Ac-GPKGMPGEEGHH-COOH</b> |                         |                                                                                      |
| 1274.50                                | [L] <sup>+</sup>        | C <sub>53</sub> H <sub>79</sub> N <sub>17</sub> O <sub>18</sub> S                    |
| 1296.48                                | [L+Na] <sup>+</sup>     | (C <sub>53</sub> H <sub>78</sub> N <sub>17</sub> O <sub>18</sub> S)Na                |
| 1318.46                                | [L+2Na] <sup>+</sup>    | (C <sub>53</sub> H <sub>77</sub> N <sub>17</sub> O <sub>18</sub> S)Na <sub>2</sub>   |
| 1335.41                                | [CuL] <sup>+</sup>      | (C <sub>53</sub> H <sub>77</sub> N <sub>17</sub> O <sub>18</sub> S)Cu                |
| 1357.39                                | [CuL+Na] <sup>+</sup>   | (C <sub>53</sub> H <sub>76</sub> N <sub>17</sub> O <sub>18</sub> S)CuNa              |
| 637.75                                 | [L] <sup>2+</sup>       | C <sub>53</sub> H <sub>79</sub> N <sub>17</sub> O <sub>18</sub> S                    |
| 648.74                                 | [L+Na] <sup>2+</sup>    | (C <sub>53</sub> H <sub>78</sub> N <sub>17</sub> O <sub>18</sub> S)Na                |
| 659.73                                 | [L+2Na] <sup>2+</sup>   | (C <sub>53</sub> H <sub>77</sub> N <sub>17</sub> O <sub>18</sub> S)Na <sub>2</sub>   |
| 668.21                                 | [CuL] <sup>2+</sup>     | (C <sub>53</sub> H <sub>77</sub> N <sub>17</sub> O <sub>18</sub> S)Cu                |
| 679.20                                 | [CuL+Na] <sup>2+</sup>  | (C <sub>53</sub> H <sub>76</sub> N <sub>17</sub> O <sub>18</sub> S)CuNa              |
| 690.19                                 | [CuL+2Na] <sup>2+</sup> | (C <sub>53</sub> H <sub>75</sub> N <sub>17</sub> O <sub>18</sub> S)CuNa <sub>2</sub> |
| 701.18                                 | [CuL+3Na] <sup>2+</sup> | (C <sub>53</sub> H <sub>74</sub> N <sub>17</sub> O <sub>18</sub> S)CuNa <sub>3</sub> |
| 432.83                                 | [L+Na] <sup>3+</sup>    | (C <sub>53</sub> H <sub>78</sub> N <sub>17</sub> O <sub>18</sub> S)Na                |
| 440.16                                 | [L+2Na] <sup>3+</sup>   | (C <sub>53</sub> H <sub>77</sub> N <sub>17</sub> O <sub>18</sub> S)Na <sub>2</sub>   |
| 445.80                                 | [CuL] <sup>3+</sup>     | (C <sub>53</sub> H <sub>77</sub> N <sub>17</sub> O <sub>18</sub> S)Cu                |

|        |                  |                                     |
|--------|------------------|-------------------------------------|
| 447.48 | $[L+3Na]^{3+}$   | $(C_{53}H_{76}N_{17}O_{18}S)Na_3$   |
| 453.13 | $[CuL+Na]^{3+}$  | $(C_{53}H_{76}N_{17}O_{18}S)CuNa$   |
| 460.45 | $[CuL+2Na]^{3+}$ | $(C_{53}H_{75}N_{17}O_{18}S)CuNa_2$ |

*Cu(II)-Ac-GPKGMPHGH-COOH*

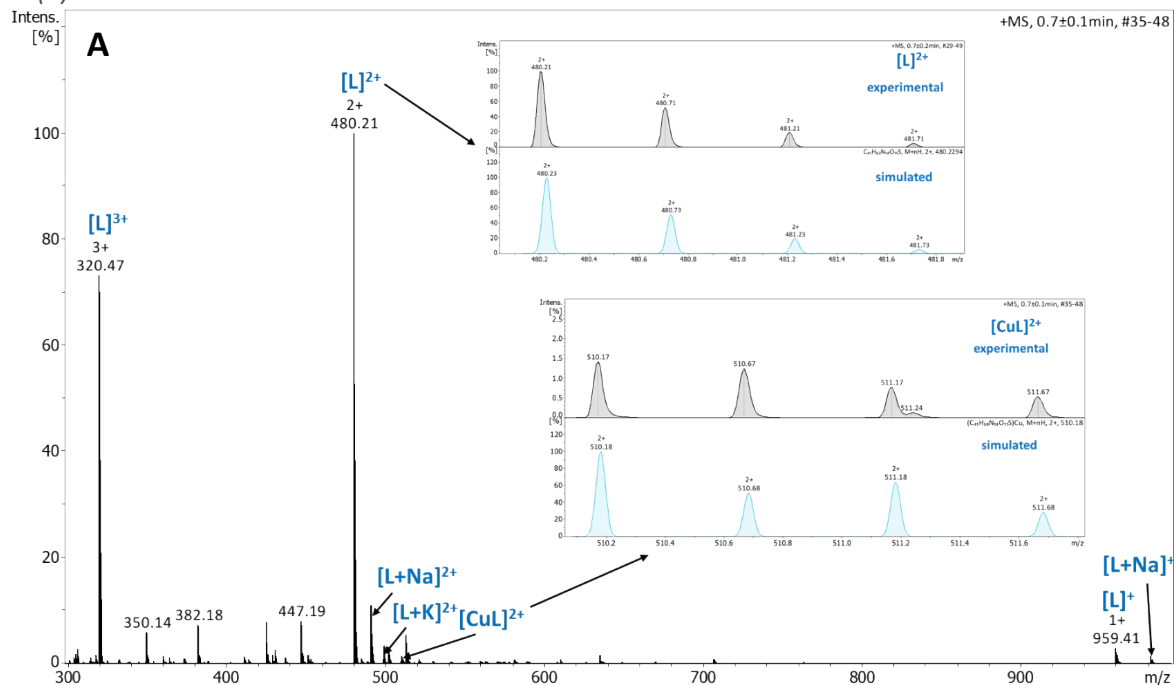

*Cu(II)-Ac-GPKGMPGEEGH-COOH*

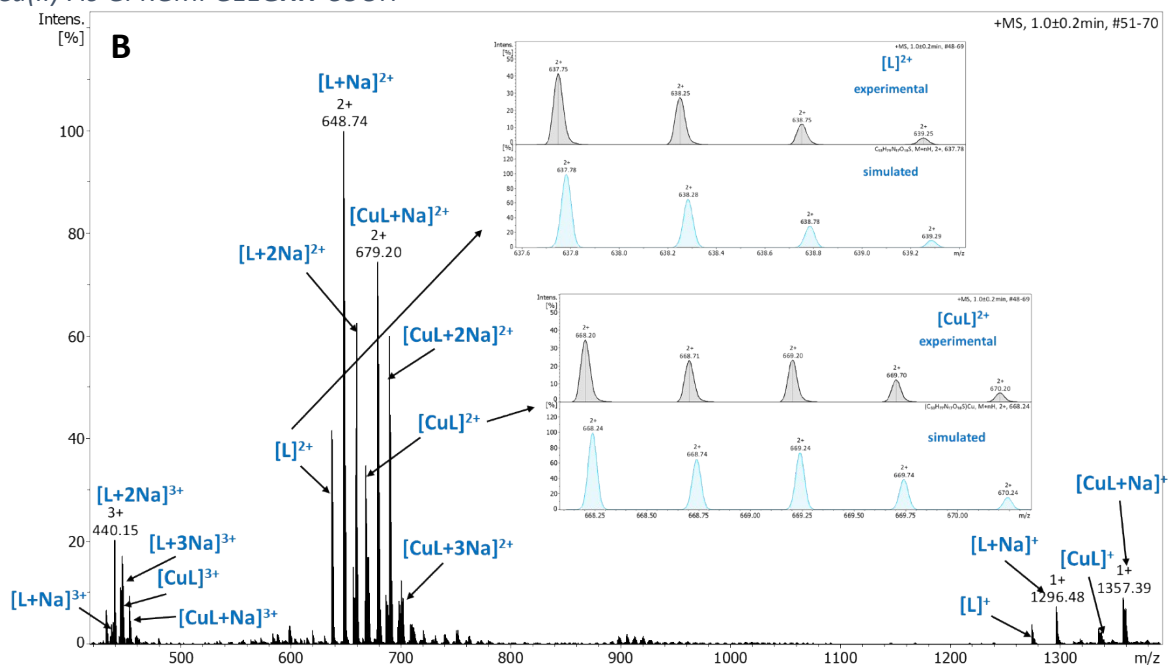

Figure S1 High-resolution ESI-MS spectrum of Cu(II) complexes with the (A) Ac- Ac-GPKGMPHGH-COOH and (B) Ac-GPKGMPGEEGH-COOH. M:L molar ratio = 0.9:1 in water:methanol 50:50 solution. Inside the spectra: comparison of experimental and simulated isotopic patterns for selected ligand and complex species.

Table S2 Stoichiometry, molecular formula and average m/z value for the species present in ESI-MS spectra of Zn(II) complexes with the (A) Ac-GPKGMPHGH-COOH and (B) Ac-GPKGMPGEEGHH-COOH, M:L molar ratio = 0.9:1 in water:methanol 50:50 solution.

| m/z                                    | ion                    | Molecular formula                                                                  |
|----------------------------------------|------------------------|------------------------------------------------------------------------------------|
| <b>(A) Zn(II)-Ac-GPKGMPHGH-COOH</b>    |                        |                                                                                    |
| 959.46                                 | [L] <sup>+</sup>       | C <sub>41</sub> H <sub>62</sub> N <sub>14</sub> O <sub>11</sub> S                  |
| 981.45                                 | [L+Na] <sup>+</sup>    | (C <sub>41</sub> H <sub>61</sub> N <sub>14</sub> O <sub>11</sub> S)Na              |
| 997.41                                 | [L+K] <sup>+</sup>     | (C <sub>41</sub> H <sub>61</sub> N <sub>14</sub> O <sub>11</sub> S)K               |
| 480.23                                 | [L] <sup>2+</sup>      | C <sub>41</sub> H <sub>62</sub> N <sub>14</sub> O <sub>11</sub> S                  |
| 491.23                                 | [L+Na] <sup>2+</sup>   | (C <sub>41</sub> H <sub>61</sub> N <sub>14</sub> O <sub>11</sub> S)Na              |
| 499.21                                 | [L+K] <sup>2+</sup>    | (C <sub>41</sub> H <sub>61</sub> N <sub>14</sub> O <sub>11</sub> S)K               |
| 502.22                                 | [L+2Na] <sup>2+</sup>  | (C <sub>41</sub> H <sub>60</sub> N <sub>14</sub> O <sub>11</sub> S)Na <sub>2</sub> |
| 510.20                                 | [ZnL] <sup>2+</sup>    | (C <sub>41</sub> H <sub>58</sub> N <sub>14</sub> O <sub>11</sub> S)Zn              |
| 521.20                                 | [ZnL+Na] <sup>2+</sup> | (C <sub>41</sub> H <sub>57</sub> N <sub>14</sub> O <sub>11</sub> S)ZnNa            |
| 529.19                                 | [ZnL+K] <sup>2+</sup>  | (C <sub>41</sub> H <sub>57</sub> N <sub>14</sub> O <sub>11</sub> S)ZnK             |
| <b>(B) Zn(II)-Ac-GPKGMPGEEGHH-COOH</b> |                        |                                                                                    |
| 637.79                                 | [L] <sup>2+</sup>      | C <sub>53</sub> H <sub>79</sub> N <sub>17</sub> O <sub>18</sub> S                  |
| 648.78                                 | [L+Na] <sup>2+</sup>   | (C <sub>53</sub> H <sub>78</sub> N <sub>17</sub> O <sub>18</sub> S)Na              |
| 656.77                                 | [L+K] <sup>2+</sup>    | (C <sub>53</sub> H <sub>78</sub> N <sub>17</sub> O <sub>18</sub> S)K               |
| 659.77                                 | [L+2Na] <sup>2+</sup>  | (C <sub>53</sub> H <sub>77</sub> N <sub>17</sub> O <sub>18</sub> S)Na <sub>2</sub> |
| 668.75                                 | [ZnL] <sup>2+</sup>    | (C <sub>53</sub> H <sub>75</sub> N <sub>17</sub> O <sub>18</sub> S)Zn              |
| 679.74                                 | [ZnL+Na] <sup>2+</sup> | (C <sub>53</sub> H <sub>74</sub> N <sub>17</sub> O <sub>18</sub> S)ZnNa            |

### Zn(II)-Ac-GPKGMPHGH-COOH

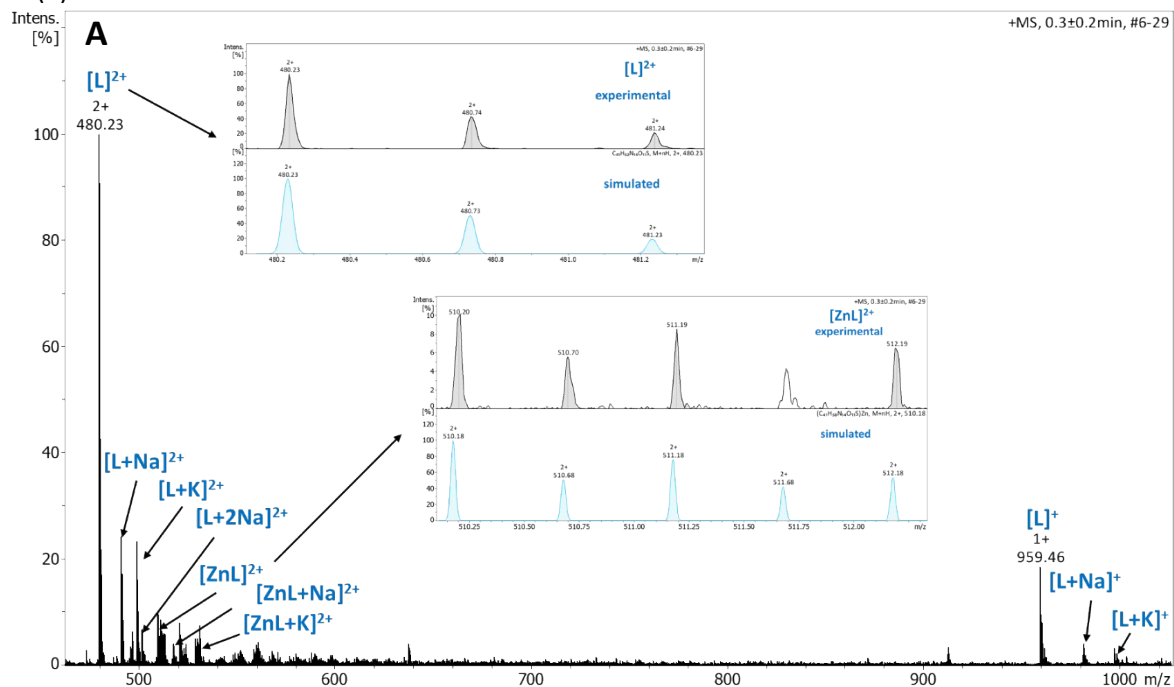

Zn(II)-Ac-GPKGMPGEEGHH-COOH

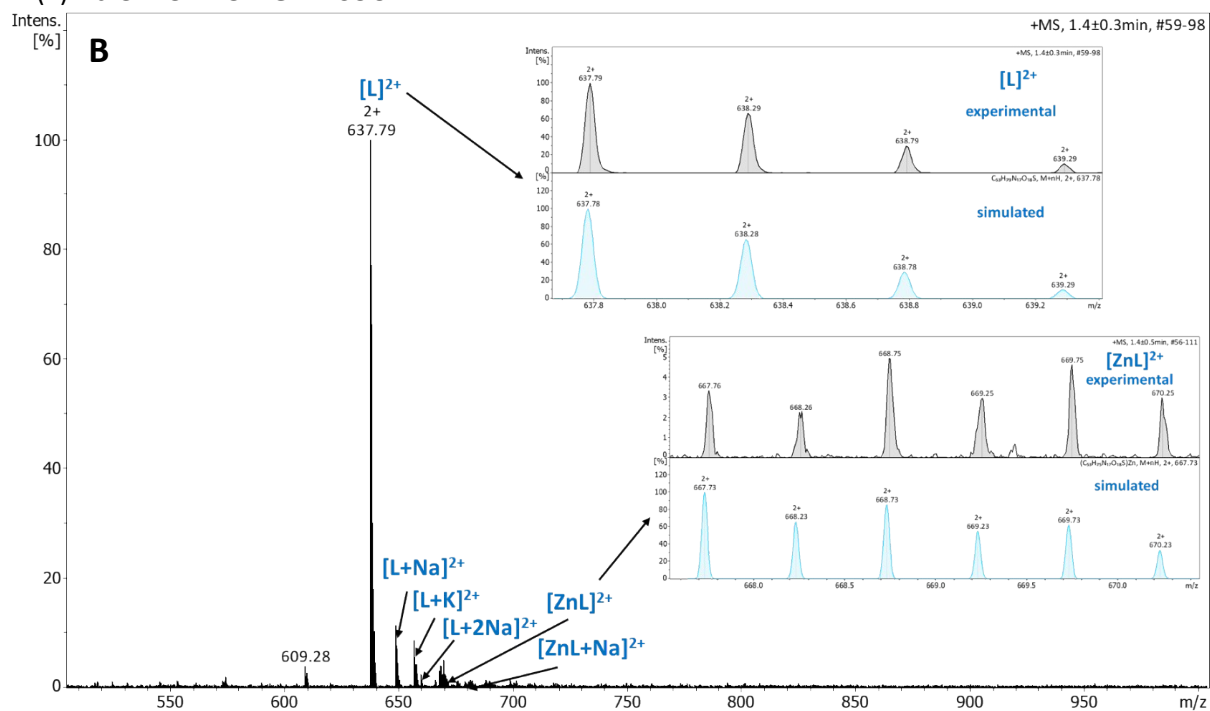

Figure S2 High-resolution ESI-MS spectrum of Zn(II) complexes with the (A) Ac- Ac-GPKGMPHGH-COOH and (B) Ac-GPKGMPGEEGHH-COOH. M:L molar ratio = 0.9:1 in water:methanol 50:50 solution. Inside the spectra: comparison of experimental and simulated isotopic patterns for selected ligand and complex species.

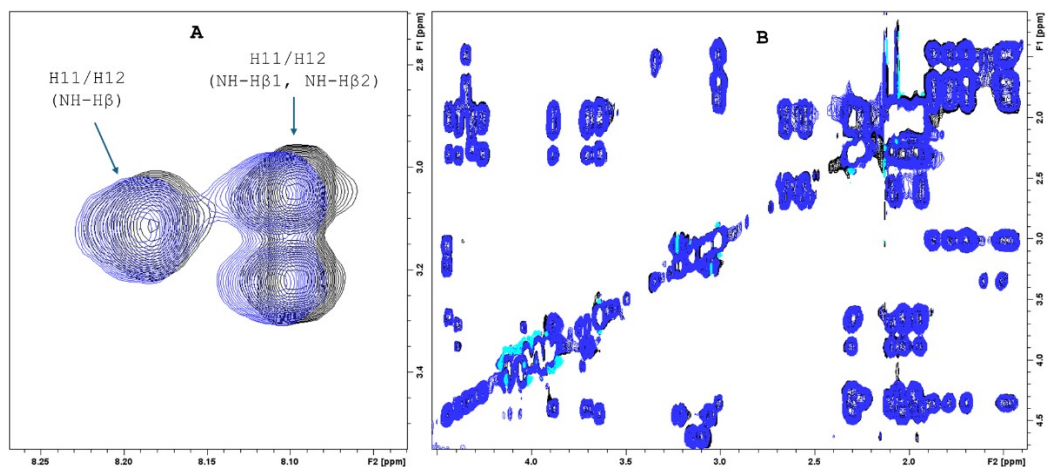

Figure S3 Superimposition of the amide (A) and aliphatic (B) regions of 2D  $^1\text{H}$ - $^1\text{H}$  TOCSY spectra of Ac-GPKGMPGEEGHH-COOH recorded in absence (black) and in presence of 0.9 Zn(II) eqs. (blue).  $T=288\text{ K}$ ,  $C_M=0.5\text{ mM}$ , phosphate buffer=20 mM, pH 7.4.

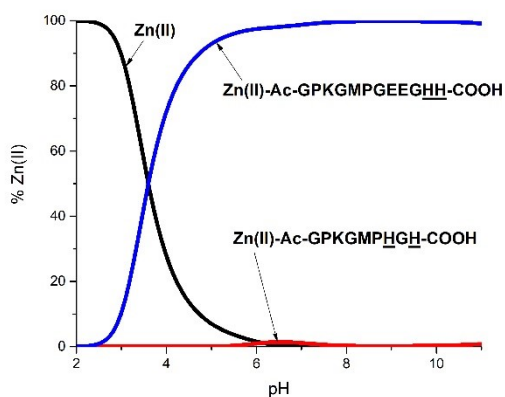

Figure S4 Competition plots for a simulated solution containing equimolar concentrations of Zn(II), Ac-GPKGMPHGH-COOH and Ac-GPKGMPGEEGHH-COOH. The diagram is calculated from the overall stability constants of the binary complexes and simulate a situation in which equimolar concentrations of all of the chosen ligands and metal are present in a solution.

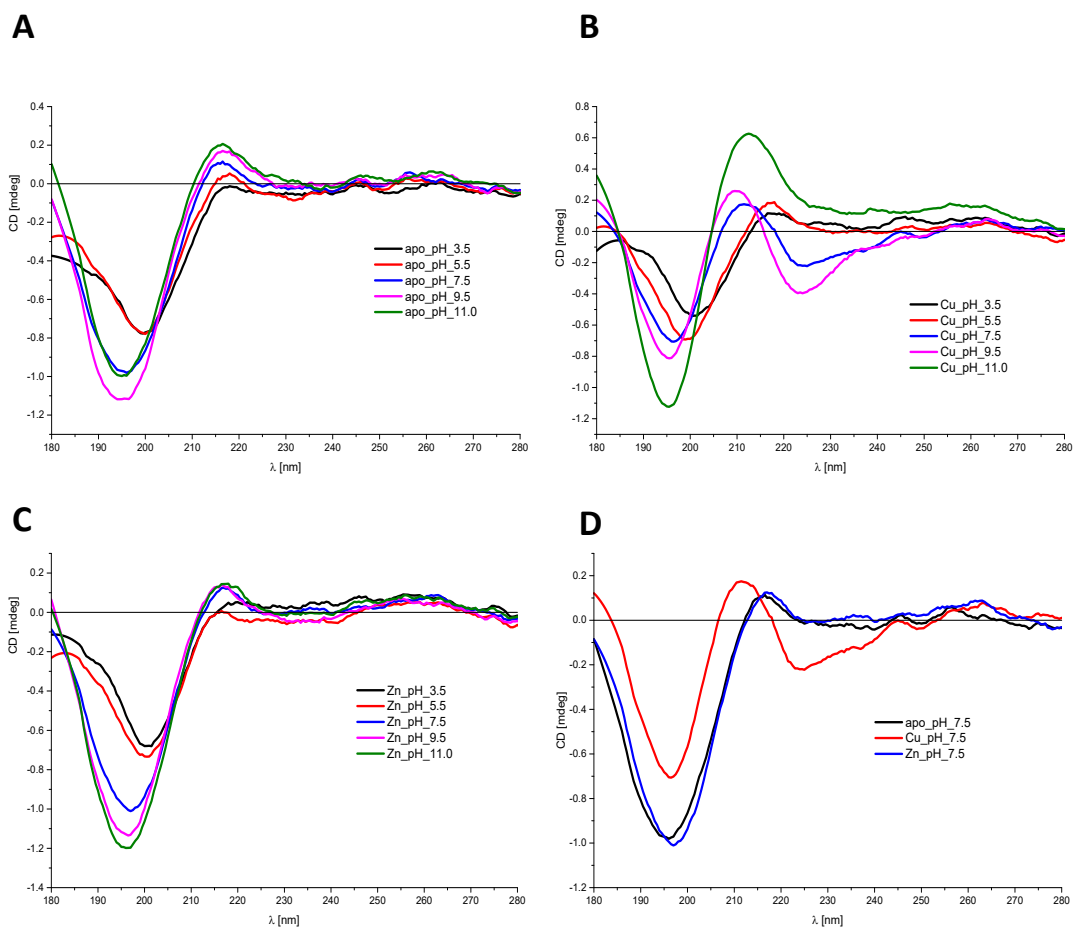

Figure S5 CD spectra for (A) Ac-GPKGMPHGH-COOH; (B) Cu(II)-Ac-GPKGMPHGH-COOH, (C) Zn(II)-Ac-GPKGMPHGH-COOH recorded over the entire pH range (pH 3.5–11.0) in aqueous solution of 4 mM HClO<sub>4</sub> with I = 0.1 M NaClO<sub>4</sub>, T = 298 K, M:L molar ratio = 0.9:1, C<sub>l</sub> = 0.1 mM. (D) Comparison of CD spectra of apo, Cu(II), and Zn(II) species at pH 7.5.

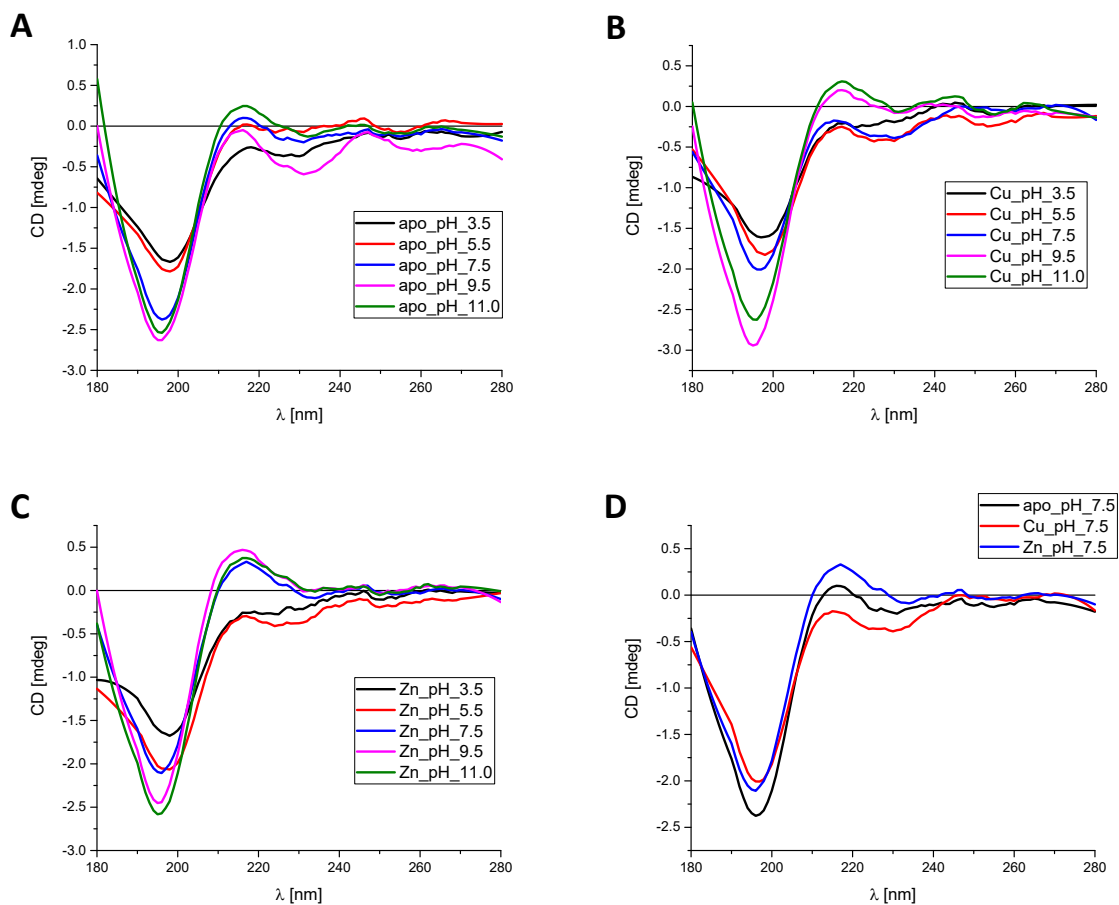

Figure S6 CD spectra for (A) Ac-GPKGMPGEEGHH-COOH; (B) Cu(II)-Ac-GPKGMPGEEGHH-COOH, (C) Zn(II)-Ac-GPKGMPGEEGHH-COOH recorded over the entire pH range (pH 3.5–11.0) in aqueous solution of 4 mM HClO<sub>4</sub> with  $\text{I} = 0.1$  M NaClO<sub>4</sub>,  $T = 298$  K, M:L molar ratio = 0.9:1,  $C_L = 0.1$  mM. (D) Comparison of CD spectra of apo, Cu(II), and Zn(II) species at pH 7.5.
